# Supplementary material for: Compromised Integrity, Burnout, and Intent to Leave the Job in Critical Care Nurses and Physicians
Source: PubMed Central journal article supplement — Crit Care Explor. 2022 Feb 7;4(2):e0629. doi: 10.1097/CCE.0000000000000629 (PMC8824411; doi:10.1097/cce.0000000000000629), 2022-02-07
Supplement: cc9-4-e0629-s001.pdf [file cc9-4-e0629-s001.pdf]

Supplement 1. Intent to leave practice direct effects Odds Ratios

| Variable/<br>outcome | Non-Critical Care Clinicians<br>(Physicians and Nurses)<br>N = 313 |      |        |       |             | Critical Care Clinicians<br>(Physicians and Nurses)<br>N= 313 |      |        |       |             | Percent<br>Difference<br>in Odds<br>Ratios |
|----------------------|--------------------------------------------------------------------|------|--------|-------|-------------|---------------------------------------------------------------|------|--------|-------|-------------|--------------------------------------------|
|                      | OR                                                                 | SE   | 95% CI |       | p-<br>value | OR                                                            | SE   | 95% CI |       | p-<br>value |                                            |
|                      |                                                                    |      | Lower  | Upper |             |                                                               |      | Lower  | Upper |             |                                            |
| INTENT<br>TO LEAVE   |                                                                    |      |        |       |             |                                                               |      |        |       |             |                                            |
| BURNOUT              | 2.0                                                                | 0.71 | 1.00   | 4.00  | 0.049       | 4.1                                                           | 1.6  | 2.00   | 8.65  | 0.000       | 51.26%                                     |
| INTEGRITY            | 3.2                                                                | 1.1  | 1.63   | 6.28  | 0.001       | 2.9                                                           | 0.87 | 1.6    | 5.19  | 0.000       | -11.11%                                    |
| STRESS               | 1.87                                                               | 0.63 | 0.96   | 3.63  | 0.064       | 1.63                                                          | 0.49 | 0.902  | 2.93  | 0.106       | -14.94%                                    |
| FEAR                 | 1.68                                                               | 0.55 | 0.89   | 3.18  | 0.113       | 1.18                                                          | 0.41 | 0.59   | 2.33  | 0.644       | -42.63%                                    |
| ANXIETY              | 0.88                                                               | 0.28 | 0.46   | 1.65  | 0.68        | 1.03                                                          | 0.33 | 0.56   | 1.92  | 0.92        | 15.29%                                     |
| WORK<br>LOAD         | 1.01                                                               | 0.35 | 0.51   | 1.98  | 0.983       | 0.67                                                          | 0.24 | 0.33   | 1.36  | 0.272       | -49.40%                                    |
| PURPOSE              | 1.25                                                               | 0.38 | 0.68   | 2.28  | 0.478       | 0.87                                                          | 0.26 | 0.48   | 1.56  | 0.635       | -43.43%                                    |
| VALUE                | 0.50                                                               | 0.17 | 0.26   | 0.95  | 0.03        | 0.33                                                          | 0.12 | 0.16   | 0.66  | 0.002       | -51.97%                                    |
| BURNOUT              |                                                                    |      |        |       |             |                                                               |      |        |       |             |                                            |
| INTEGRITY            | 1.35                                                               | 0.60 | 0.57   | 3.24  | 0.497       | 2.74                                                          | 1.17 | 1.18   | 6.32  | 0.019       | 50.53%                                     |
| STRESS               | 3.72                                                               | 1.29 | 1.88   | 7.36  | 0.000       | 2.68                                                          | 0.97 | 1.31   | 5.44  | 0.007       | -39.12%                                    |
| FEAR                 | 0.67                                                               | 0.21 | 0.36   | 1.25  | 0.206       | 2.03                                                          | 0.70 | 1.04   | 3.97  | 0.039       | 66.99%                                     |
| ANXIETY              | 3.27                                                               | 1.14 | 1.65   | 6.46  | 0.001       | 6.01                                                          | 2.17 | 2.97   | 12.19 | 0.000       | 45.71%                                     |
| WORK<br>LOAD         | 3.82                                                               | 1.23 | 2.03   | 7.12  | 0.000       | 2.67                                                          | 0.96 | 1.32   | 5.39  | 0.006       | -43.19%                                    |
| PURPOSE              | 0.94                                                               | 0.30 | 0.50   | 1.75  | 0.84        | 0.60                                                          | 0.19 | 0.29   | 1.08  | 0.084       | -68.15%                                    |
| VALUE                | 0.30                                                               | 0.09 | 0.16   | 0.54  | 0.000       | 0.59                                                          | 0.20 | 0.30   | 1.16  | 0.125       | 49.65%                                     |
| INTEGRITY            |                                                                    |      |        |       |             |                                                               |      |        |       |             |                                            |
| STRESS               | 1.77                                                               | 0.66 | 3.24   | 3.67  | 0.122       | 1.17                                                          | 1.17 | 0.66   | 2.09  | 0.59        | -51.10%                                    |
| FEAR                 | 2.13                                                               | 0.86 | 7.36   | 4.69  | 0.062       | 1.34                                                          | 1.39 | 0.85   | 2.85  | 0.37        | -53.35%                                    |
| ANXIETY              | 1.50                                                               | 0.51 | 1.25   | 2.93  | 0.234       | 2.37                                                          | 2.37 | 1.32   | 4.30  | 0.004       | 36.58%                                     |
| WORK<br>LOAD         | 2.32                                                               | 0.90 | 6.46   | 4.95  | 0.030       | 3.63                                                          | 3.63 | 1.73   | 7.61  | 0.001       | 36.15%                                     |
| PURPOSE              | 1.01                                                               | 0.36 | 7.19   | 2.02  | 0.972       | 0.83                                                          | 0.83 | 0.46   | 1.51  | 0.542       | -21.92%                                    |
| VALUE                | 0.29                                                               | 0.12 | 1.76   | 0.64  | 0.002       | 0.51                                                          | 0.51 | 0.25   | 1.04  | 0.062       | 43.30%                                     |
